# Supplementary material for: Phosphorization of a Prussian blue analogue-derived Co–N–C catalyst for synchronously boosting the oxygen reduction and evolution reactions
Source: Royal Society of Chemistry journal article supplement (doi:10.1039/d0se00156b), 2020-01-01
Supplement: d0se00156b1.pdf [file d0se00156b1.pdf]

## Supplementary Information

### **Phosphorization of Prussian Blue Analogue-derived Co-N-C Catalyst for Synchronously Boosting the Oxygen Reduction And Evolution Reactions**

Xiangyang Zhou, Lei Xu, Yuning Gao, Liang Li, Jingjing Tang\*, Juan Yang\*

School of Metallurgy and Environment, Central South University, Changsha 410083,  
China

\*Corresponding author: Jingjing Tang, Juan Yang

E-mail: tangjj@csu.edu.cn; j-yang@csu.edu.cn

Phone: +86-731-88836329; Fax: +86-731-88871017

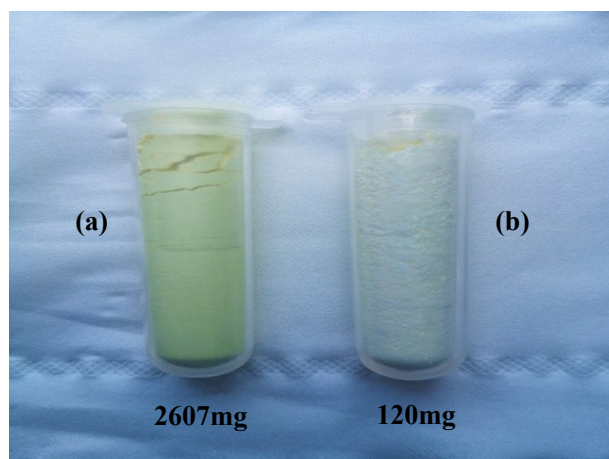

**Figure S1.** Photographs of (a) Bulk  $g\text{-C}_3\text{N}_4$  and (b) GCNS

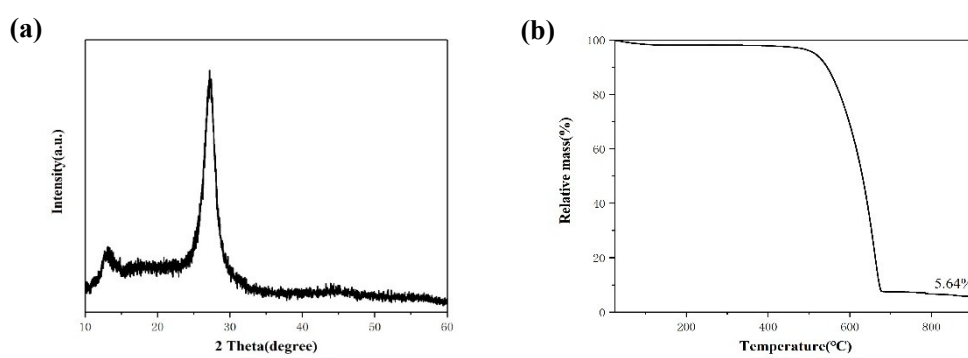

**Figure S2.** (a) XRD pattern of GCNS and (b) TGA curve of GCNS under Ar.

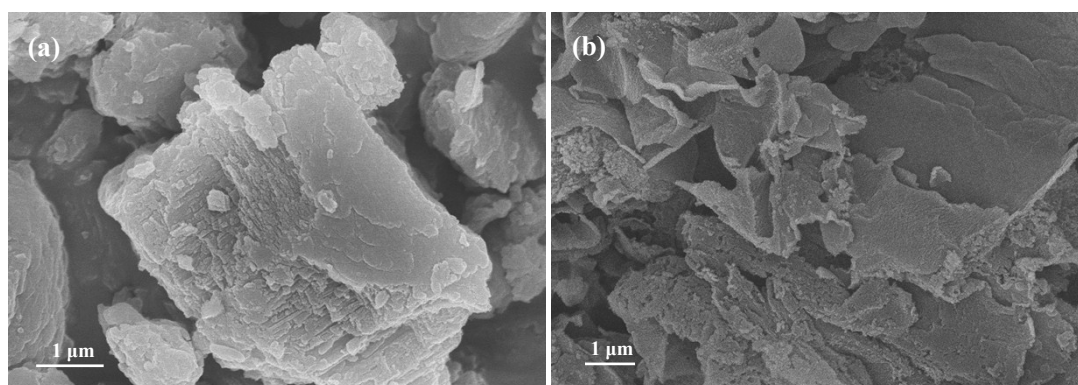

**Figure S3.** SEM images of (a) Bulk  $g\text{-C}_3\text{N}_4$  and (b) GCNS.

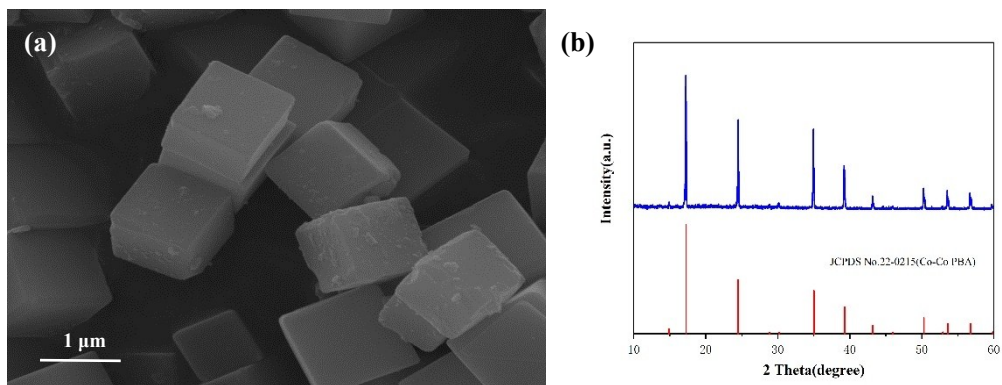

Figure S4. (a) SEM image of CoCo-PBA and (b) XRD pattern of CoCo-PBA.

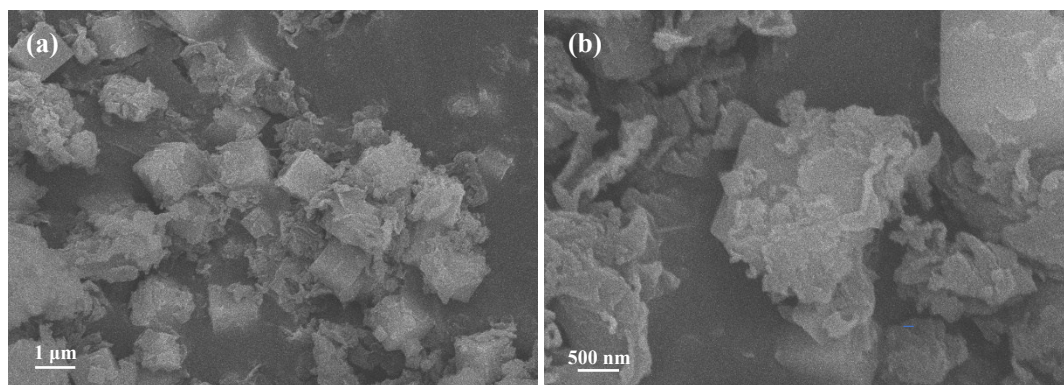

Figure S5. SEM images of CoCo-PBA@GCNS.

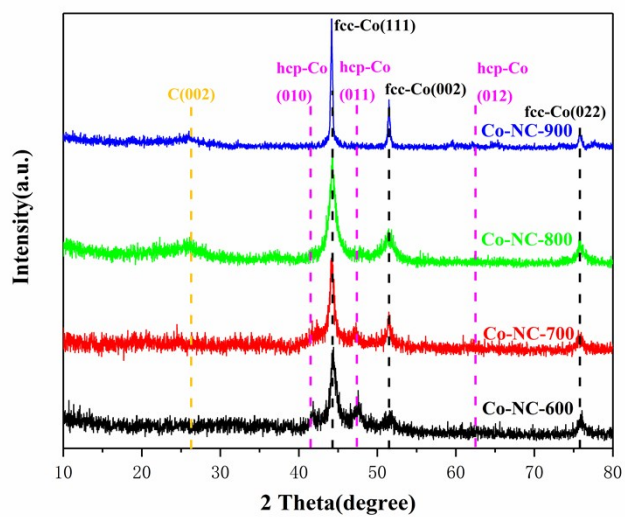

Figure S6. XRD patterns of the Co-NC-T catalysts obtained at different temperatures from 600 to 900°C.

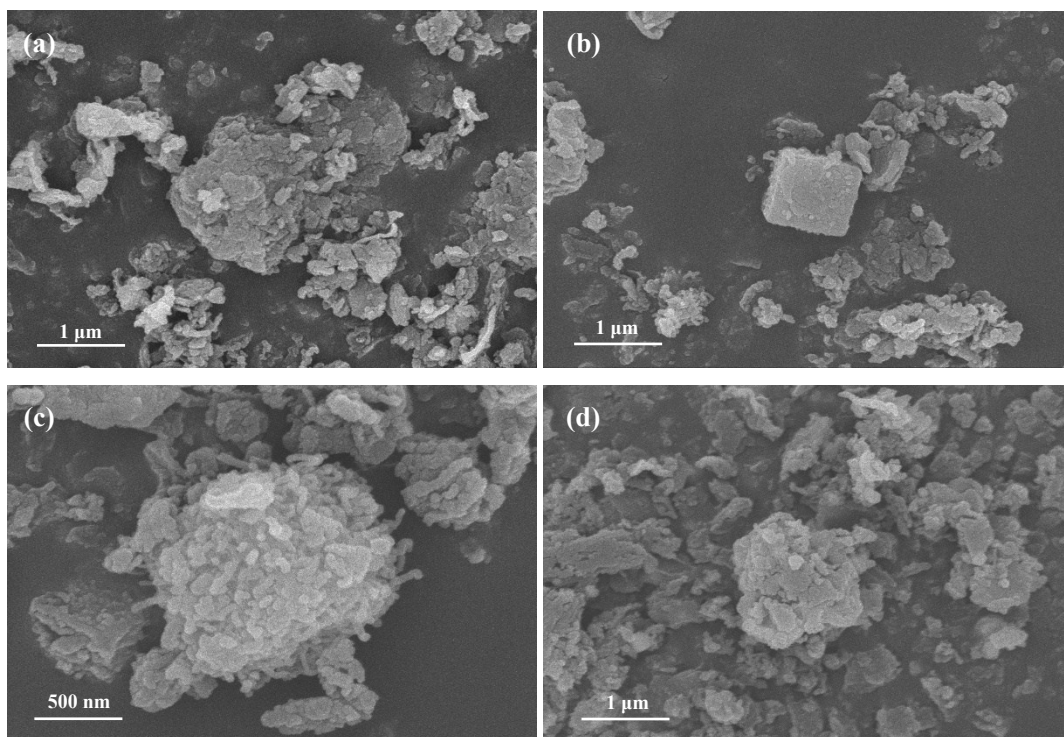

**Figure S7.** SEM images of the (a) Co-NC-600, (b) Co-NC-700, (c) Co-NC-800 and (d) Co-NC-900.

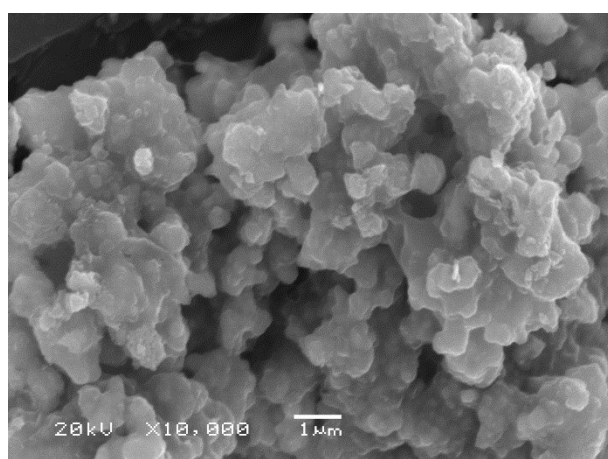

**Figure S8.** SEM image of the PBA-800.

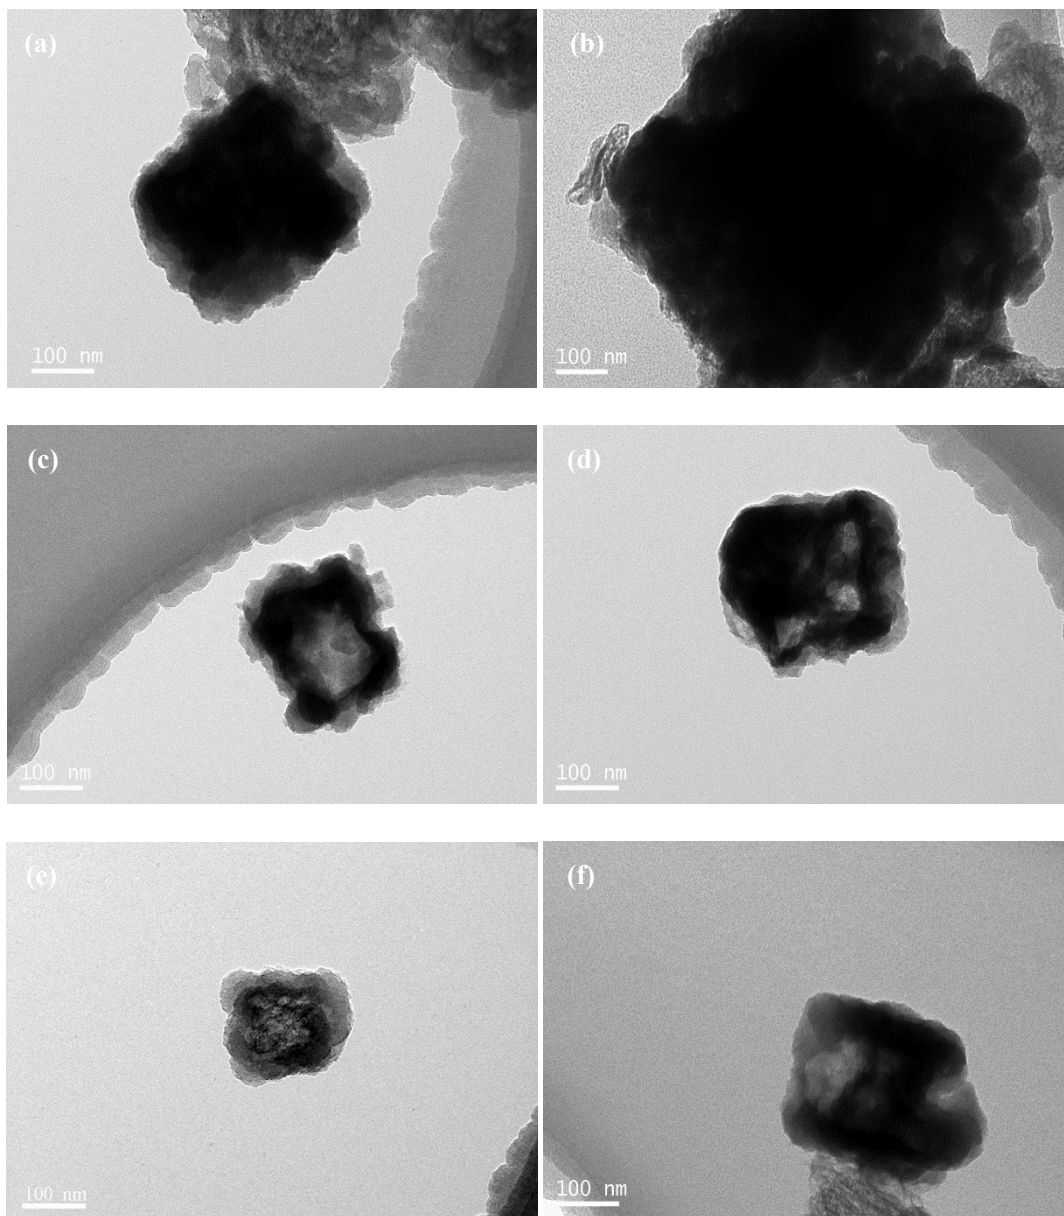

**Figure S9.** TEM images of CoP-NPC (a-b) defects; (c-d) cavities; (e-f) broken.

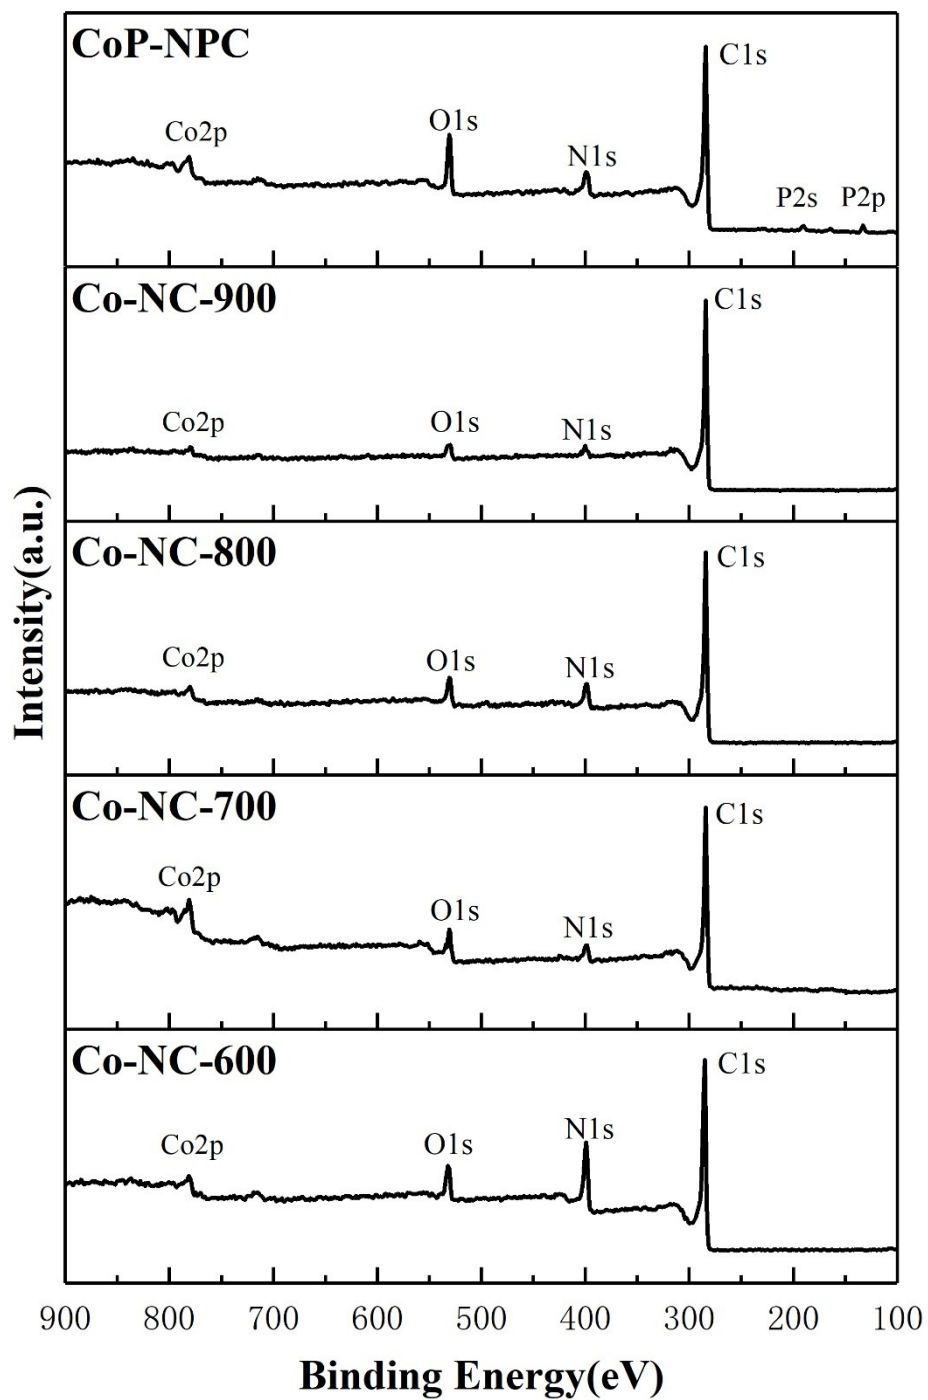

**Figure S10.** XPS survey spectra of the CoP-NPC and Co-NC-T catalysts obtained at (A) 600°C, (B) 700°C, (C) 800°C, (D) 900°C

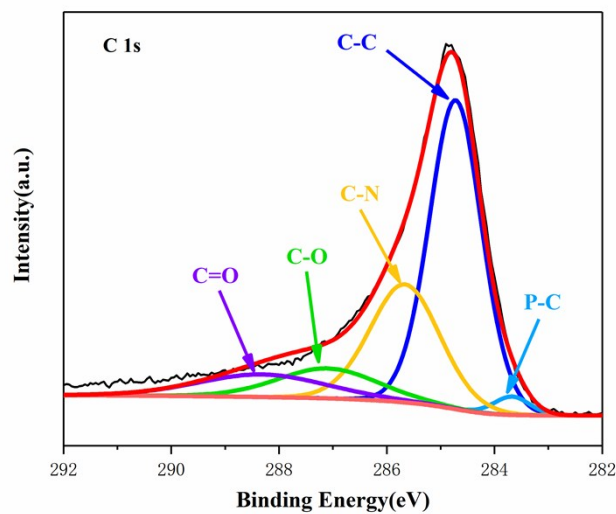

Figure S11. High-resolution C 1s XPS spectra of the CoP-NPC.

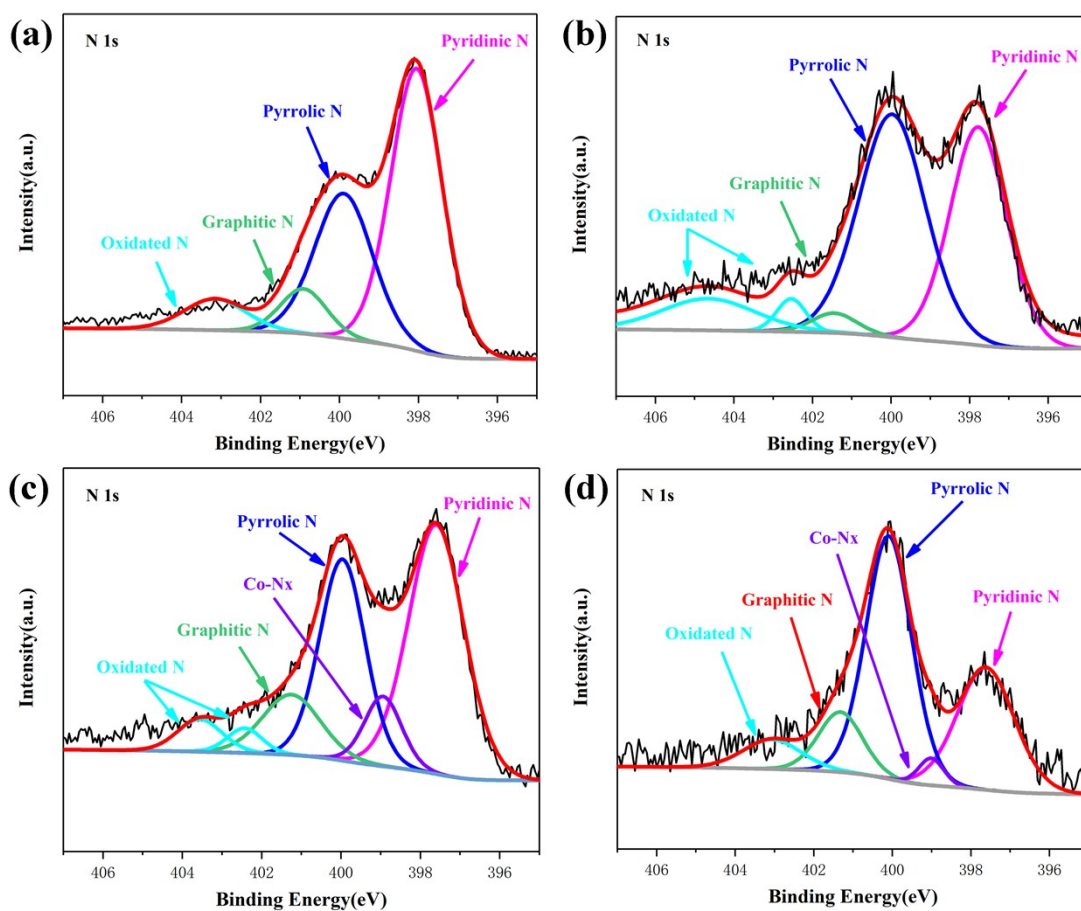

Figure S12. High-resolution N 1s XPS spectra of Co-NC-T obtained at (a) 600°C, (b) 700°C, (c) 800°C, (d) 900°C.

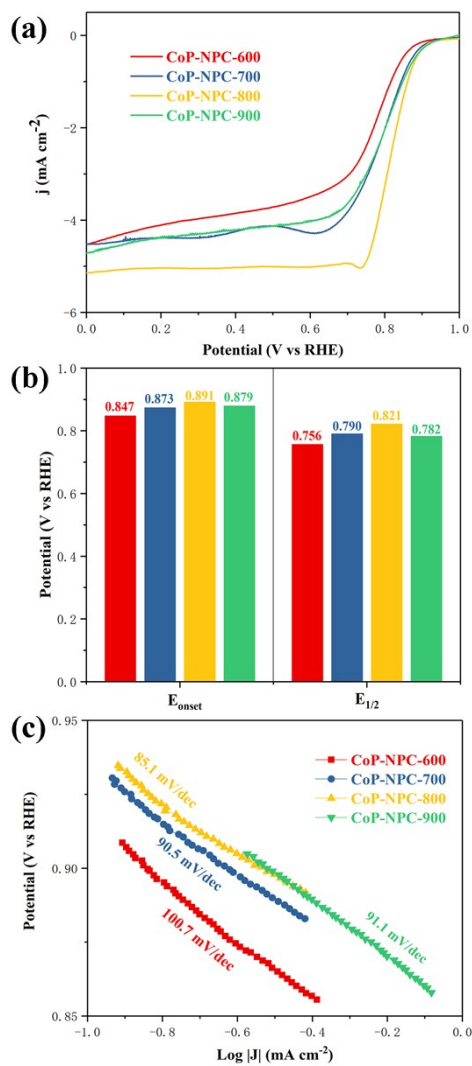

**Figure S13.** (a) LSV curves of CoP-NPC-T (T=600°C, 700°C, 800°C, 900°C); (b) Bar plots of  $E_{onset}$  and  $E_{1/2}$ ; (c) Tafel plots of different samples.

(a)

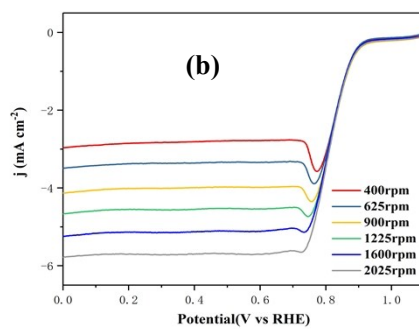



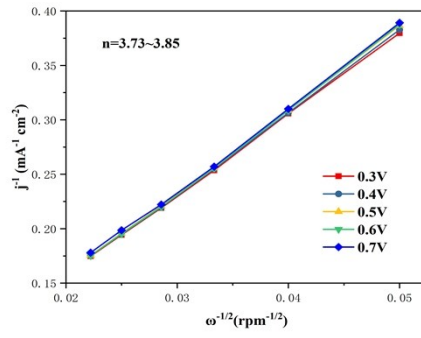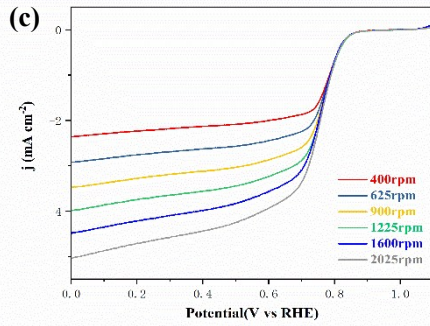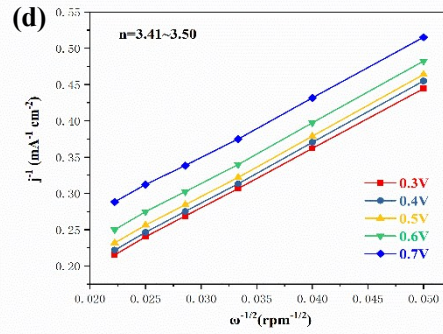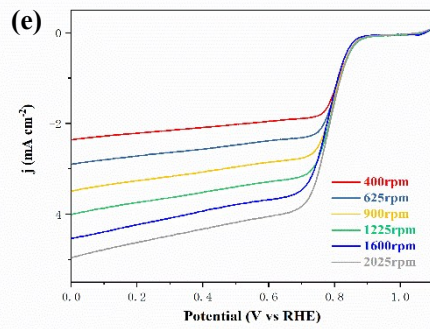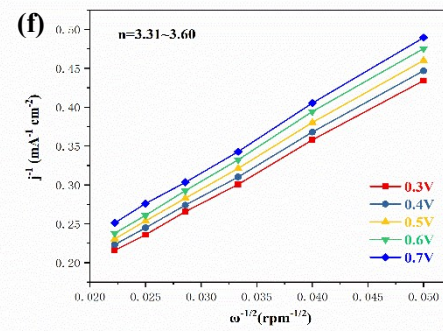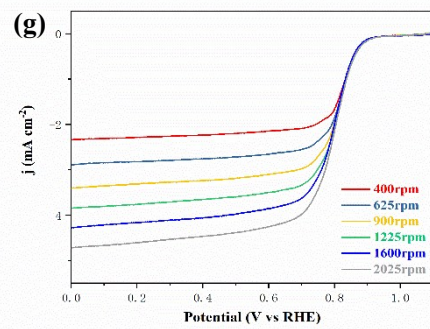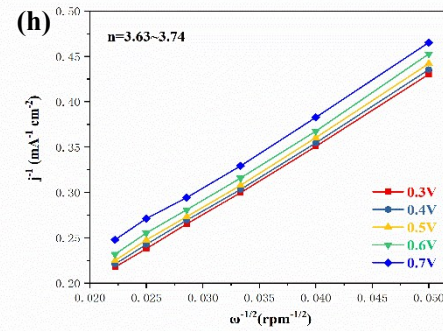

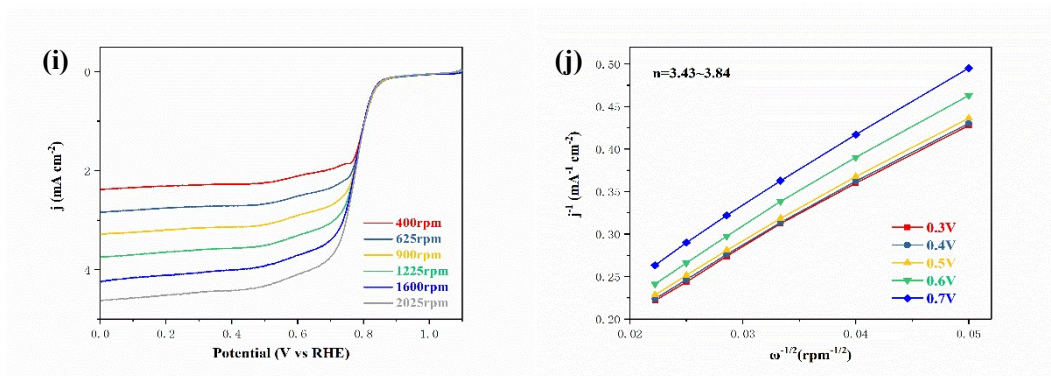

**Figure S14.** LSV curves of (a) CoP-NPC and the Co-NC-T obtained at (c) 600°C, (e) 700°C, (g) 800°C, (i) 900°C at different rotating speeds; K-L plots for (b) CoP-NPC and the Co-NC-T obtained at (d) 600°C, (f) 700°C, (h) 800°C, (j) 900°C.

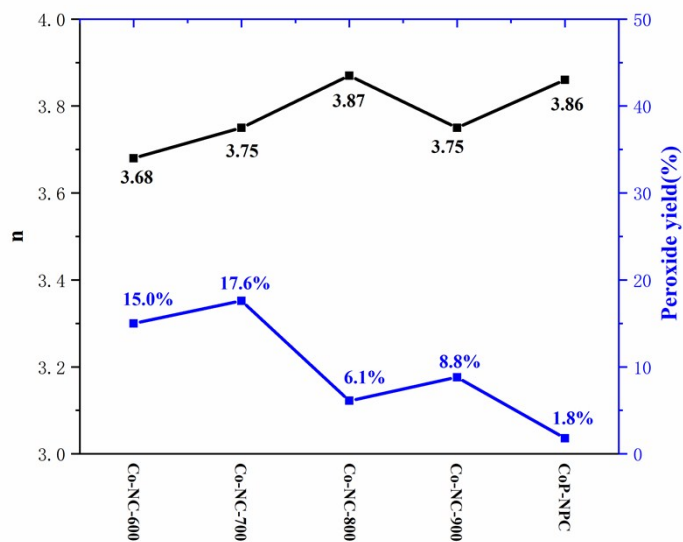

**Figure S15.** Peroxide yield (blue) with regard to the total oxygen reduction products and the electron-transfer number ( $n$ ) (black) of samples in O<sub>2</sub>-saturated 0.1M KOH at 1600rpm.

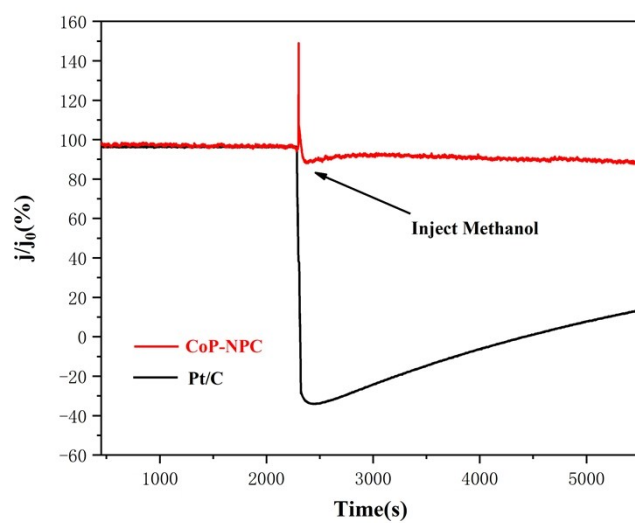

**Figure S16.** Methanol crossover tolerance test of CoP-NPC and Pt/C conducted by chronoamperometry measurement;

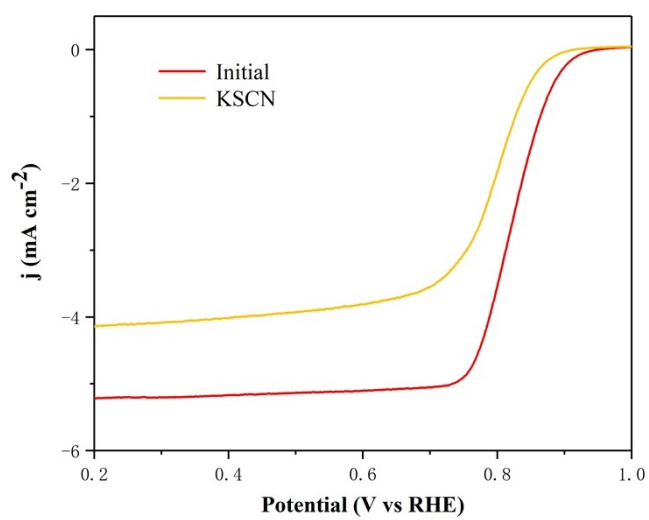

**Figure S17.** Effect of KSCN addition on the electrocatalytic activity of CoP-NPC.

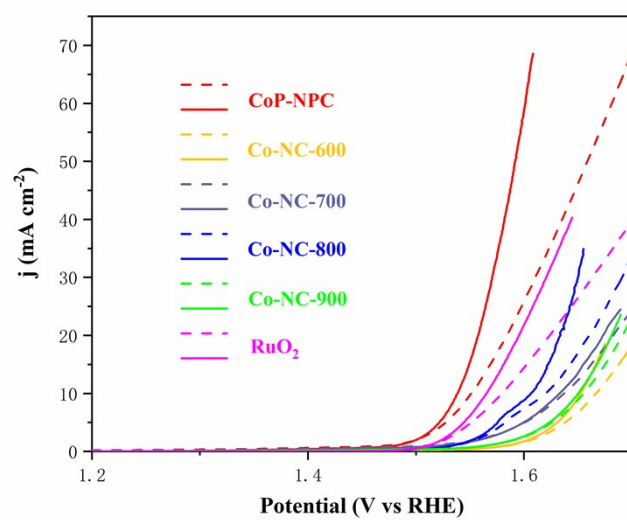

**Figure S18.** The LSV curves of Co-NC-T (600°C, 700°C, 800°C, 900°C), RuO<sub>2</sub> and CoP-NPC with IR-correction (solid line) and without IR-correction (dashed line).

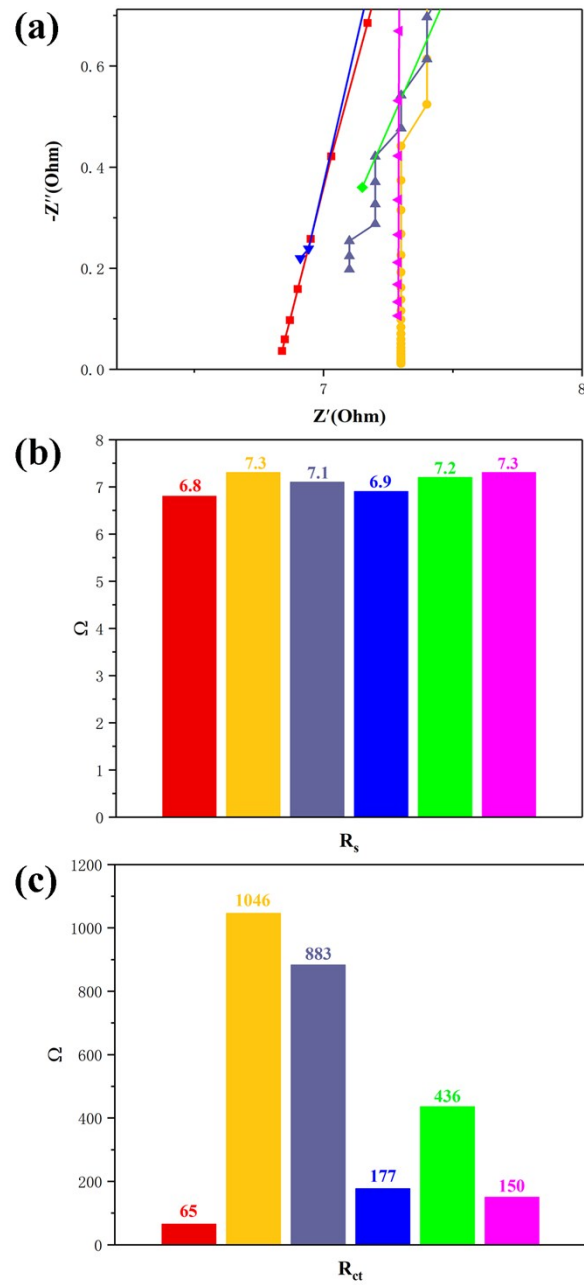

**Figure S19.** (a) The zoomed view of the plots in the high frequency regions; (b) The  $R_s$  and (c)  $R_{ct}$  values of CoP-NPC, Co-NC-T (600°C, 700°C, 800°C, 900°C) and RuO<sub>2</sub>.

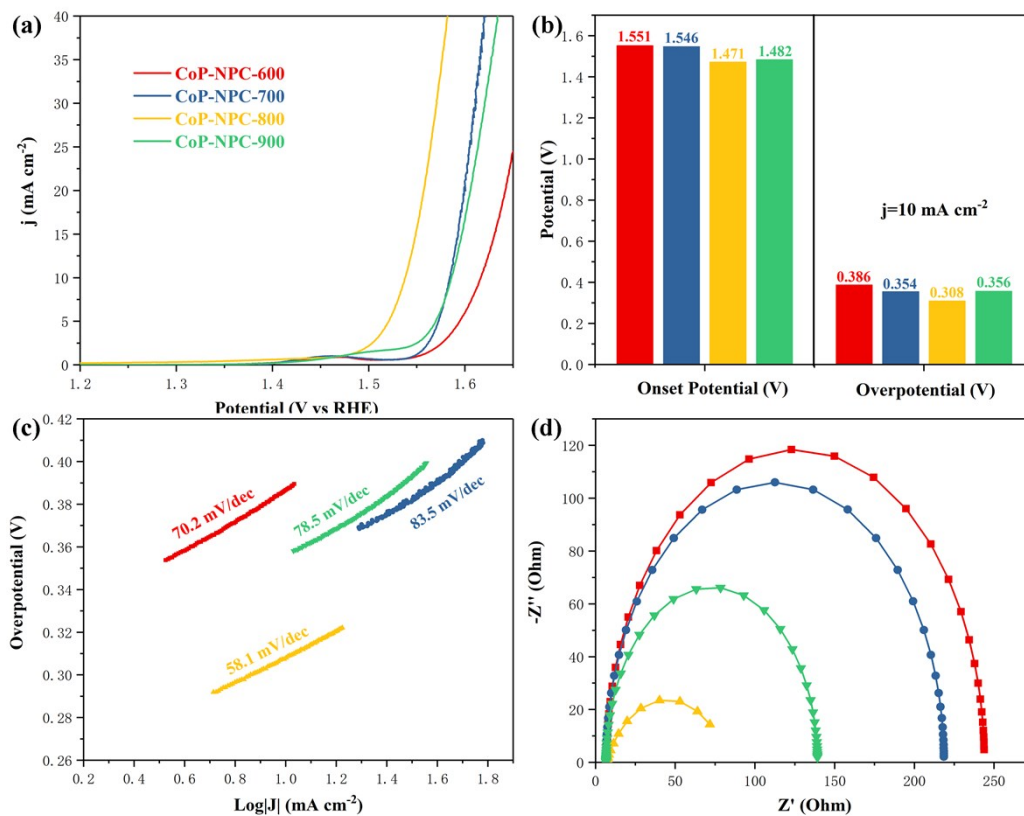

**Figure S20.** (a) OER LSV curves with  $IR_s$ -correction; (b) Overpotentials and the onset potentials of different samples; (c) Tafel plots of different samples; (d) Nyquist plots of different samples.

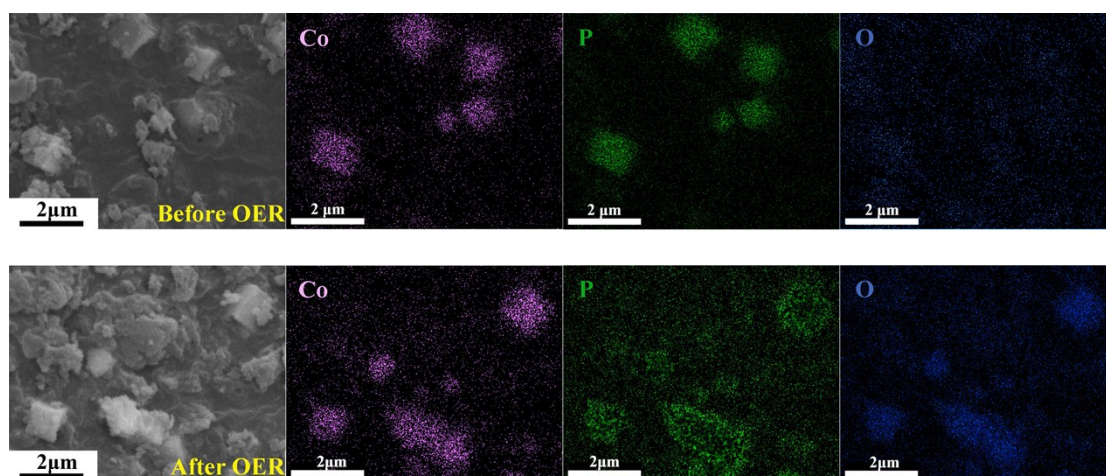

Figure S21. SEM images and corresponding elemental mapping before and after OER stability test in 1M KOH.

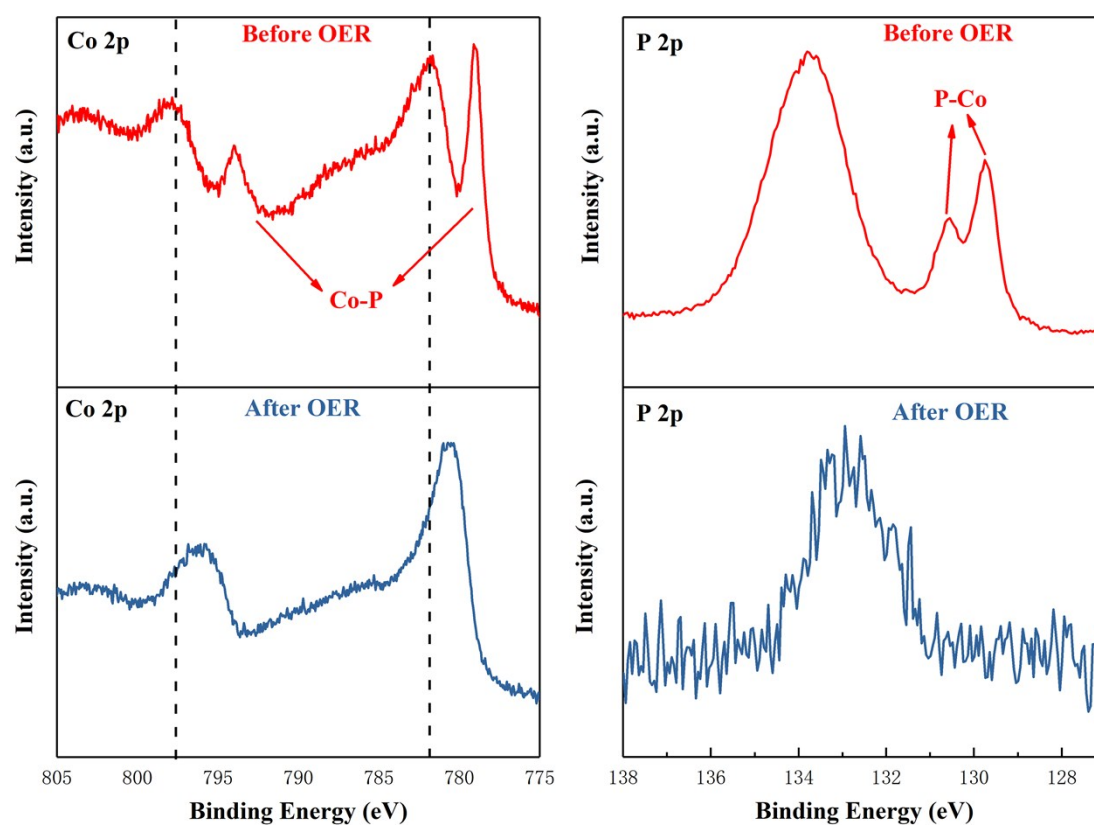

Figure S22. High-resolution Co 2p and P 2p XPS spectra of the CoP-NPC before and after the OER stability test.

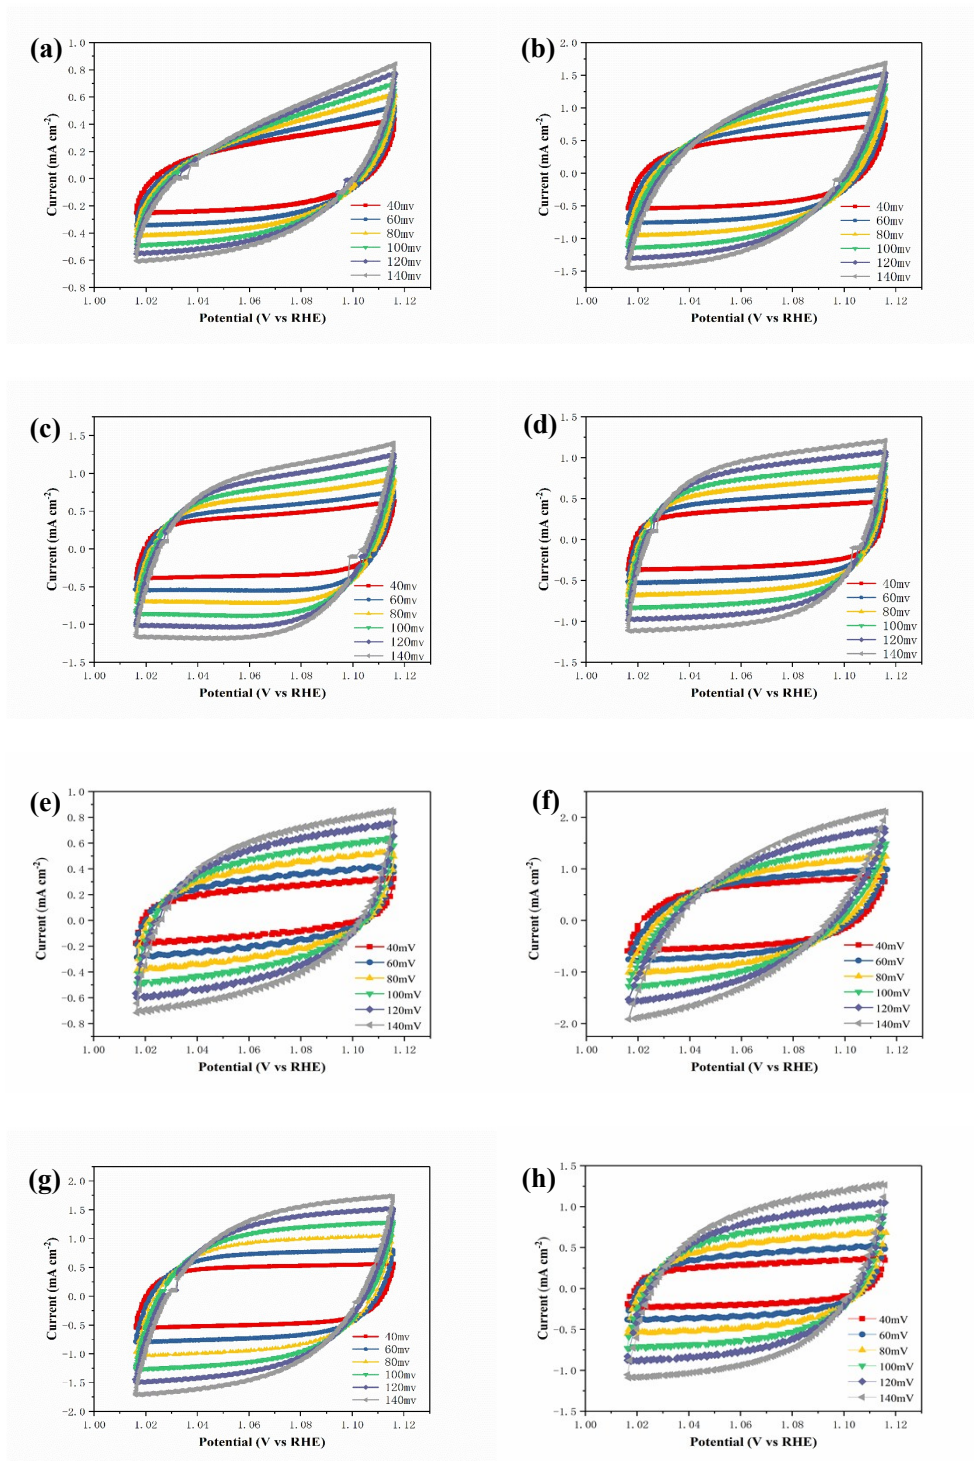

**Figure S23.** Cyclic voltammograms recorded at various scan rates for (a) Co-NC-600, (b) Co-NC-700, (c) Co-NC-800, (d) Co-NC-900, (e) CoP-NPC-600, (f) CoP-NPC-700, (g) CoP-NPC (CoP-NPC-800) and (h) CoP-NPC-900.



**Table S1** The elemental analysis results of the catalysts by XPS

| Samples   | C ( at% ) | N ( at% ) |     |     |     |     |      | O ( at% ) | Co ( at% ) | P ( at% ) |
|-----------|-----------|-----------|-----|-----|-----|-----|------|-----------|------------|-----------|
|           |           | N-1       | N-2 | N-3 | N-4 | N-5 | SUM  |           |            |           |
| Co-NC-600 | 72.2      | 10.6      | 6.1 | 1.8 | 1.4 | 0.0 | 19.9 | 6.6       | 1.3        | 0.0       |
| Co-NC-700 | 77.6      | 3.6       | 4.4 | 0.3 | 1.2 | 0.0 | 9.5  | 11.7      | 1.2        | 0.0       |
| Co-NC-800 | 82.4      | 3.0       | 2.0 | 0.6 | 0.5 | 0.6 | 6.7  | 9.8       | 1.1        | 0.0       |
| Co-NC-900 | 90.8      | 1.2       | 1.9 | 0.5 | 0.3 | 0.1 | 4.0  | 4.3       | 0.9        | 0.0       |
| CoP-NPC   | 75.4      | 3.0       | 2.9 | 0.6 | 0.8 | 1.4 | 8.7  | 10.7      | 1.9        | 3.3       |

N-1: pyridinic N ; N-2: pyrrolic N ; N-3: graphitic N ; N-4: oxidized N ; N-5: Co-N<sub>x</sub>

**Table S2** Elemental compositions of CoP-NPC determined by ICP-OES

| Sample  | Co (wt%) | P (wt%) |
|---------|----------|---------|
| CoP-NPC | 19.1     | 17.5    |

**Table S3** Comparison of the bifunctional OER and ORR activity of CoP-NPC with other electrocatalysts previously reported

| Sample                                  | ORR(V):                | Tafel slope | OER(V):      | Tafel slope | $\Delta E(V)=$                    | Reference        |
|-----------------------------------------|------------------------|-------------|--------------|-------------|-----------------------------------|------------------|
|                                         | $E_{\text{half-wave}}$ | (mV/dec)    | $E_{j=10}$   | (mV/dec)    | $E_{j=10} - E_{\text{half-wave}}$ |                  |
| <b>CoP-NPC</b>                          | <b>0.82</b>            | <b>85</b>   | <b>1.54*</b> | <b>58</b>   | <b>0.72</b>                       | <b>This work</b> |
| Co-NC@CoP-NC                            | 0.78                   | -           | 1.56         | 79          | 0.78                              | [1]              |
| CoP-DC                                  | 0.81                   | -           | 1.55         | 52          | 0.74                              | [2]              |
| Co <sub>2</sub> P@CoNP G-900            | 0.81                   | 69          | 1.73         | 93          | 0.92                              | [3]              |
| Co-N,B-CSs                              | 0.83                   | 64          | 1.66         | -           | 0.83                              | [4]              |
| Co/Co-N-C                               | 0.78                   | 72          | 1.54*        | -           | 0.76                              | [5]              |
| Co <sub>3</sub> O <sub>4</sub> @C-MWCNT | 0.81                   | -           | 1.55*        | 62          | 0.74                              | [6]              |
| NC@Co-NGC DSNCs                         | 0.82                   | 51          | 1.64         | 91          | 0.82                              | [7]              |
| CoO/N-graphene                          | 0.81                   | 48          | 1.57         | 71          | 0.76                              | [8]              |
| NC-Co <sub>3</sub> O <sub>4</sub> /CC   | 0.86*                  | -           | 1.58*        | -           | 0.72                              | [9]              |
| Co <sub>4</sub> N/CNW/CC                | 0.80*                  | -           | 1.54*        | 81          | 0.74                              | [10]             |

\*means the electrolyte is 1M KOH.

## References

- [1]Li. X, Jiang. Q, Dou. S, Deng. L, Huo. J, Wang. S, *Journal of Materials Chemistry A*, 2016, **41**, 15836-15840.
- [2]Lin. Y, Yang. L, Zhang. Y, Jiang. H, Xiao. Z, Wu. C, Zhang. G, Jiang. J, Song. L, *Advanced Energy Materials*, 2018, **18**, 1703623.
- [3]Hao. J, Chang. L, Shen. H, Liu. Y, Li. W, Jie. L, *Electrochimica Acta*, 2017, **231**, 344-353.
- [4]Guo. Y, Yuan. P, Zhang. J, Hu. Y, Amiin. I. S, Wang. X, Zhou. J, Xia. H, Song. Z, Xu. Q, Mu. S, *ACS Nano*, 2018, **2**, 1894-1901.
- [5]Yu. P, Wang. L, Sun. F, Xie. Y, Liu. X, Ma. J, Wang. X, Tian. C, Li. J, Fu. H, *Advanced Materials*, 2019, **30**, 1901666.
- [6]Li. X, Fang. Y, Lin. X, Min. T, An. X, Yan. F, Rong. L, Jin. J, Ma. J, *Journal of Materials Chemistry A*, 2015, **33**, 17392-17402.
- [7]Liu. S, Wang. Z, Zhou. S, Yu. F, Yu. M, Chiang. C. Y, Zhou. W, Zhao. J, Qiu. J, *Advanced Materials*, 2017, **31**, 1700874.
- [8]Mao. S, Wen. Z, Huang. T, Hou. Y, Chen. J, *Energ Environ Sci*, 2014, **2**, 609-616.
- [9]Guan. C, Sumboja. A, Wu. H, Ren. W, Liu. X, Zhang. H, Liu. Z, Cheng. C, Pennycook. S. J, Wang. J, *Advanced Materials*, 2017, **44**, 1701863.
- [10]Meng. F, Zhong. H, Bao. D, Yan. J, Zhang. X, *Journal of the American Chemical Society*, 2016, **32**, 10226-10231.
